# Supplementary material
Source: PubMed Central journal article supplement (PMC3775584)
Supplement: NIHMS416325-supplement-Equations.pdf [file NIHMS416325-supplement-Equations.pdf]

# Supplementary Fig. 1

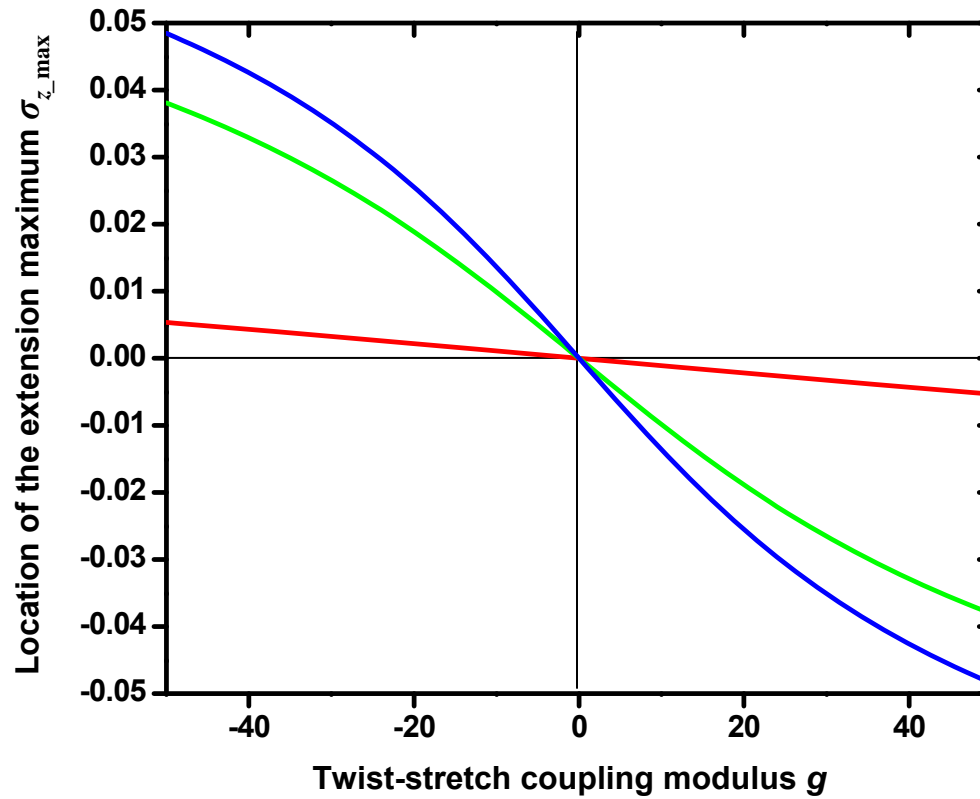

# Supplementary Fig. 1 legend

- Effect of twist-stretch coupling on the location of the extension maximum  $\sigma_{z\_max}$ . Values of  $\sigma_{z\_max}$  have been numerically calculated from Equation (2) at three different forces: 1.9 pN (red), 7.7 pN (green) and 9.6 pN (blue).

# Supplementary Fig. 2

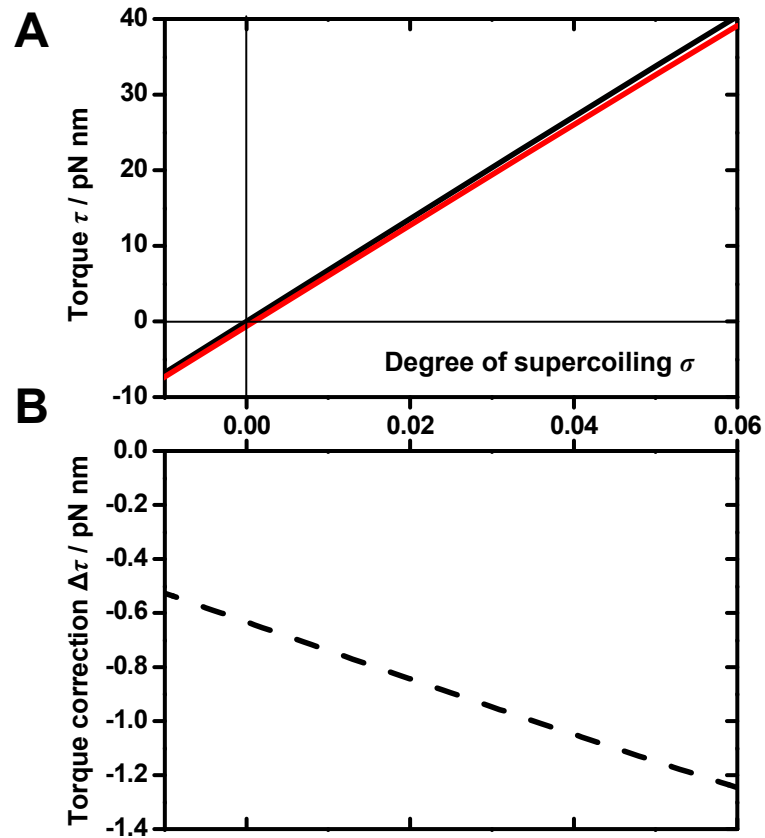

# Supplementary Fig. 2 legend

A) Effect of twist-stretch coupling on torque. According to Marko (1998), complete expression for the free energy of the DNA is

$$\frac{F}{kTL_0} = \frac{1}{A} \sqrt{\frac{Af}{kT} - \frac{1}{4} \left( C\omega_0\sigma + \frac{gf}{kT\gamma} \right)^2} + \frac{C}{2} \omega_0^2 \sigma^2 - \frac{f}{kT} - \frac{1}{2\gamma} \left( \frac{f}{kT} - g\omega_0\sigma \right)^2 \quad (\text{A})$$

Torque is equal to:

$$\tau = \frac{1}{\omega_0} \left. \frac{\partial(F/L_0)}{\partial\sigma} \right|_f = kT\omega_0\sigma \left( C - \frac{g^2}{\gamma} \right) + \frac{gf}{\gamma} - \frac{kTC}{4A} \cdot \frac{\left( C\omega_0\sigma + \frac{gf}{kT\gamma} \right)}{\sqrt{\frac{Af}{kT} - \frac{1}{4} \left( C\omega_0\sigma + \frac{gf}{kT\gamma} \right)^2}} \quad (\text{B})$$

The figure represents torque calculated using Equation (B) with same parameters as used elsewhere for 9.6 pN of force (highest force used in our experiments) and  $\mathbf{g=0}$  (black) and our measured value of  $\mathbf{g=-21}$  (red).

B) Calculated difference between torques expected in the presence and absence of twist-stretch coupling (i.e., the difference between the red and black curves in A).
